# Supplementary material for: Conductivity of composite membrane-based poly(ether-ether-ketone) sulfonated (SPEEK) nanofiber mats of varying thickness
Source: Royal Society of Chemistry journal article supplement (doi:10.1039/c6ra08228a), 2016-01-01

## Supplementary material

### FIGURE CAPTIONS FOR SUPPLEMENTARY SECTION

**Fig. S1.** Experimental photographs during the preparation process of composite membranes: a) SPEEK-PVB nanofiber mat obtained after of electrospinning process, b) Crosslinked SPEEK-PVB nanofiber mat obtained after of crosslinking process at 180°C, c) Final aspect of a SPEEK-PVB mat embedded in SPEEK-PVA polymer solution to obtain a composite membrane after of final crosslinking process.

**Fig. S2.** Bode diagram for the M-02 SPEEK-PVB-PVA composite membrane at several temperatures: 20, 40, 60, 80, 100, 120 and 140°C. The inset show the Nyquist plot for the same membrane.

**Fig. S3.** Bode diagram for the M-04 SPEEK-PVB-PVA composite membrane at several temperatures: 20, 40, 60, 80, 100, 120 and 140°C. The inset show the Nyquist plot for the same membrane.

**Fig. S4.** Bode diagram for the M-06 SPEEK-PVB-PVA composite membrane at several temperatures: 20, 40, 60, 80, 100, 120 and 140°C. The inset show the Nyquist plot for the same membrane.

**Fig. S5.** Bode diagram for the M-08 SPEEK-PVB-PVA composite membrane at several temperatures: 20, 40, 60, 80, 100, 120 and 140°C. The inset show the Nyquist plot for the same membrane.

**Fig. S6.** Bode diagram for the M-10 SPEEK-PVB-PVA composite membrane at several temperatures: 20, 40, 60, 80, 100, 120 and 140°C. The inset show the Nyquist plot for the same membrane.

**Fig. S7.** Bode diagram for the M-14 SPEEK-PVB-PVA composite membrane at several temperatures: 20, 40, 60, 80, 100, 120 and 140°C. The inset show the Nyquist plot for the same membrane.

**Fig. S8.** Bode diagram for the SPEEK<sub>65</sub>-PVA<sub>35</sub> pure membrane at several temperatures: 20, 40, 60, 80, 100, 120 and 140°C. The inset show the Nyquist plot for the same membrane.

**Fig. S9.** Double logarithmic plot of the imaginary permittivity  $\epsilon''$  versus the frequency for the sample M-02 at several temperatures 20, 40, 60, 80, 100, 120 and 140°C.

**Fig. S10.** Double logarithmic plot of the imaginary permittivity  $\epsilon''$  *versus* the frequency for the sample M-06 at several temperatures 20, 40, 60, 80, 100, 120 and 140°C.

**Fig. S11.** Double logarithmic plot of the imaginary permittivity  $\epsilon''$  *versus* the frequency for the sample M-08 at several temperatures 20, 40, 60, 80, 100, 120 and 140°C.

**Fig. S12.** Double logarithmic plot of the imaginary permittivity  $\epsilon''$  *versus* the frequency for the sample M-10 at several temperatures 20, 40, 60, 80, 100, 120 and 140°C.

**Fig. S13.** Double logarithmic plot of the imaginary permittivity  $\epsilon''$  *versus* the frequency for the sample M-12 at several temperatures 20, 40, 60, 80, 100, 120 and 140°C.

**Fig. S14.** Double logarithmic plot of the imaginary permittivity  $\epsilon''$  *versus* the frequency for the sample M-14 at several temperatures 20, 40, 60, 80, 100, 120 and 140°C.

**Fig. S15.** Double logarithmic plot of the imaginary permittivity  $\epsilon''$  *versus* the frequency for the sample SPEEK<sub>65</sub>-PVA<sub>35</sub> pure membrane at several temperatures 20, 40, 60, 80, 100, 120 and 140°C.

**Figure S1.**

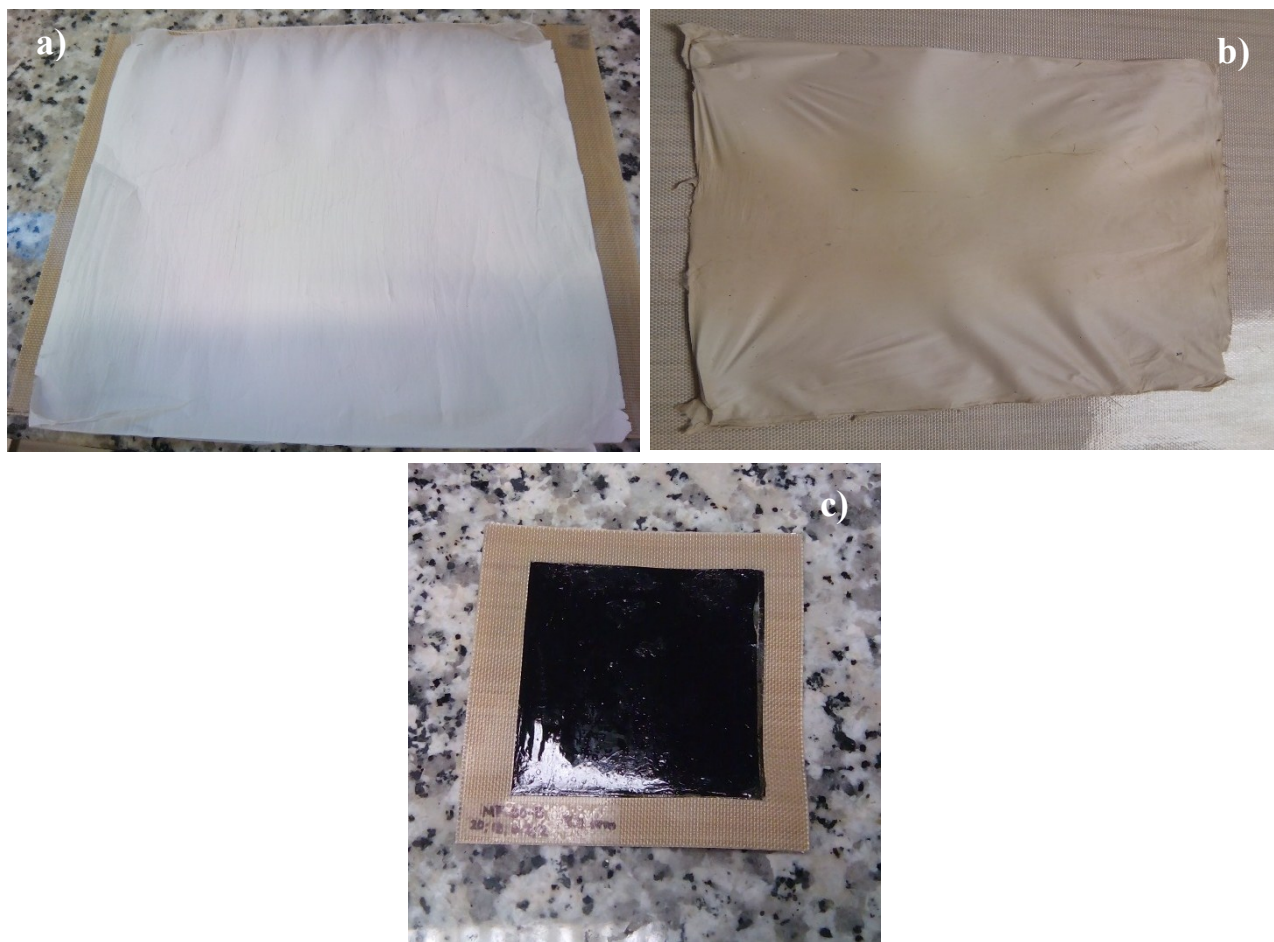

Figure S2.

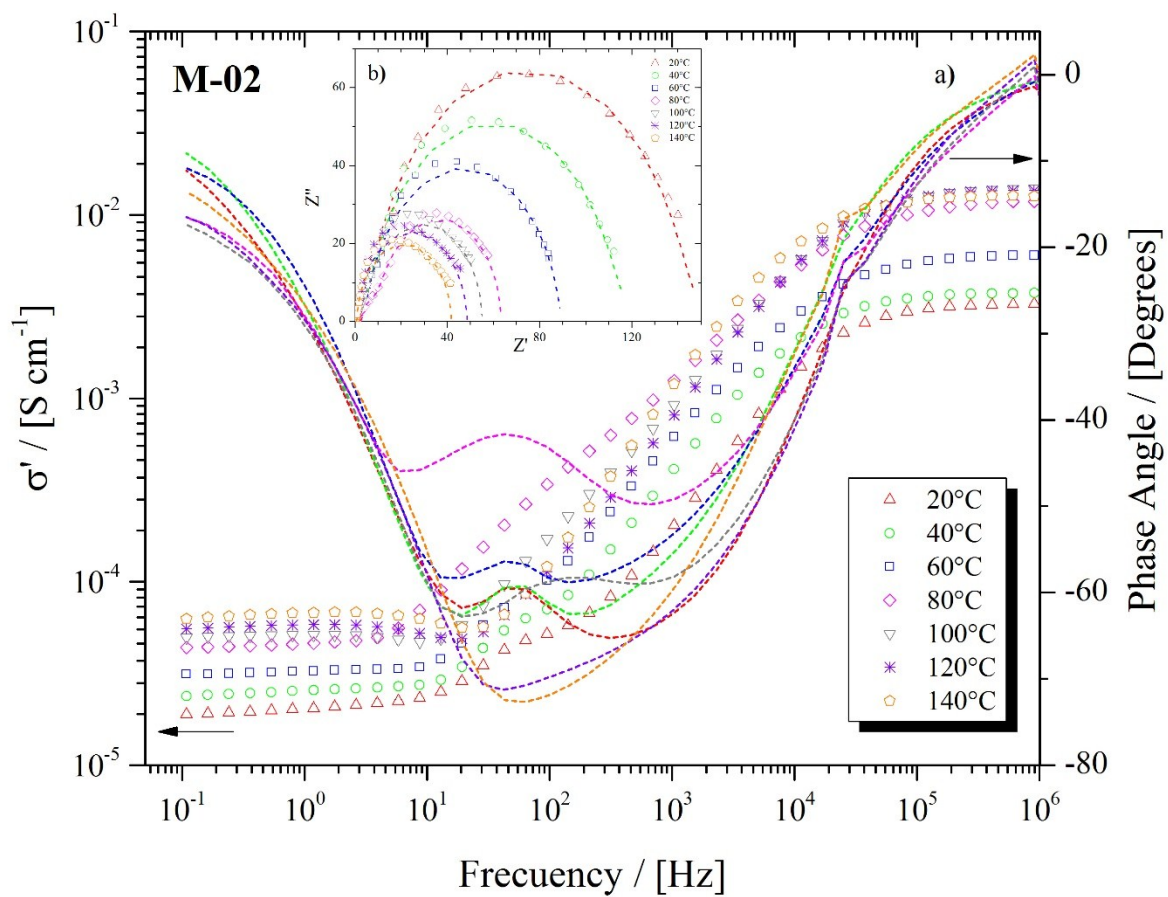

Figure S3.

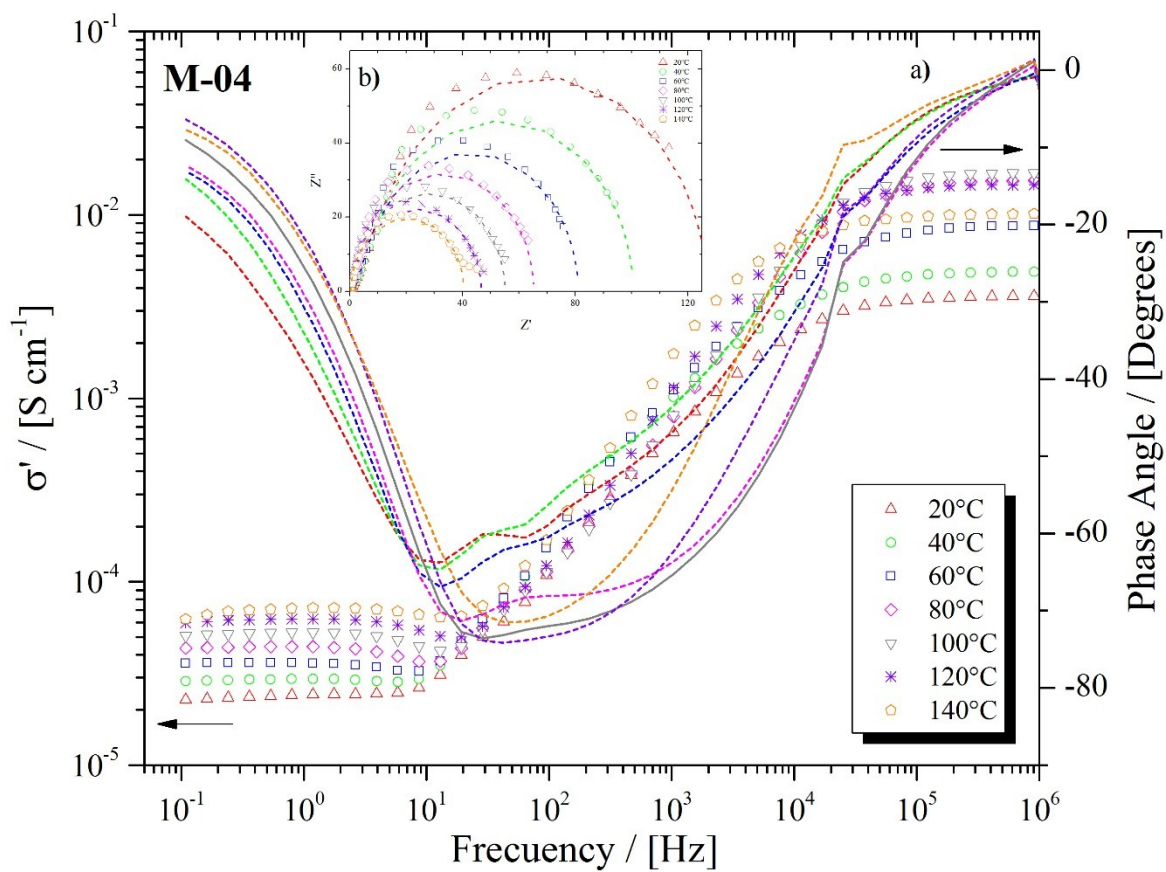

Figure S4.

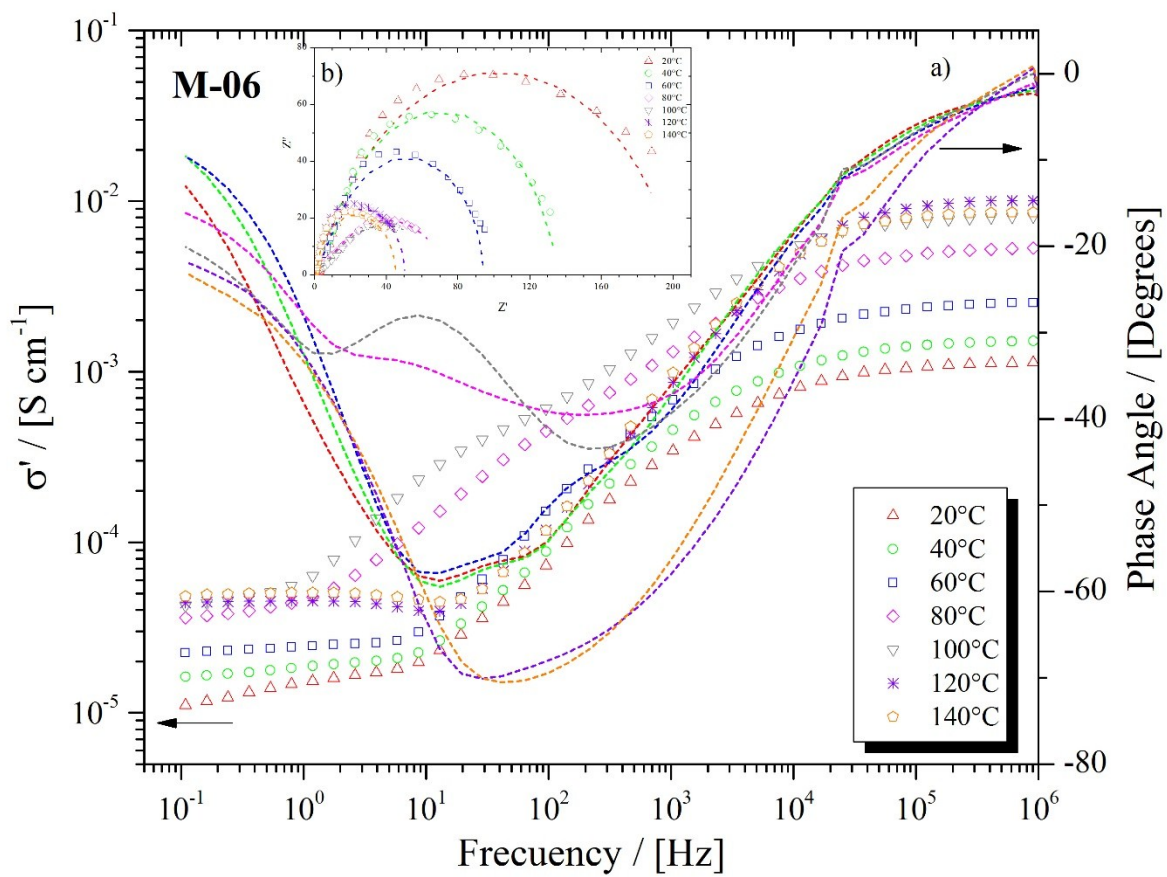

Figure S5.

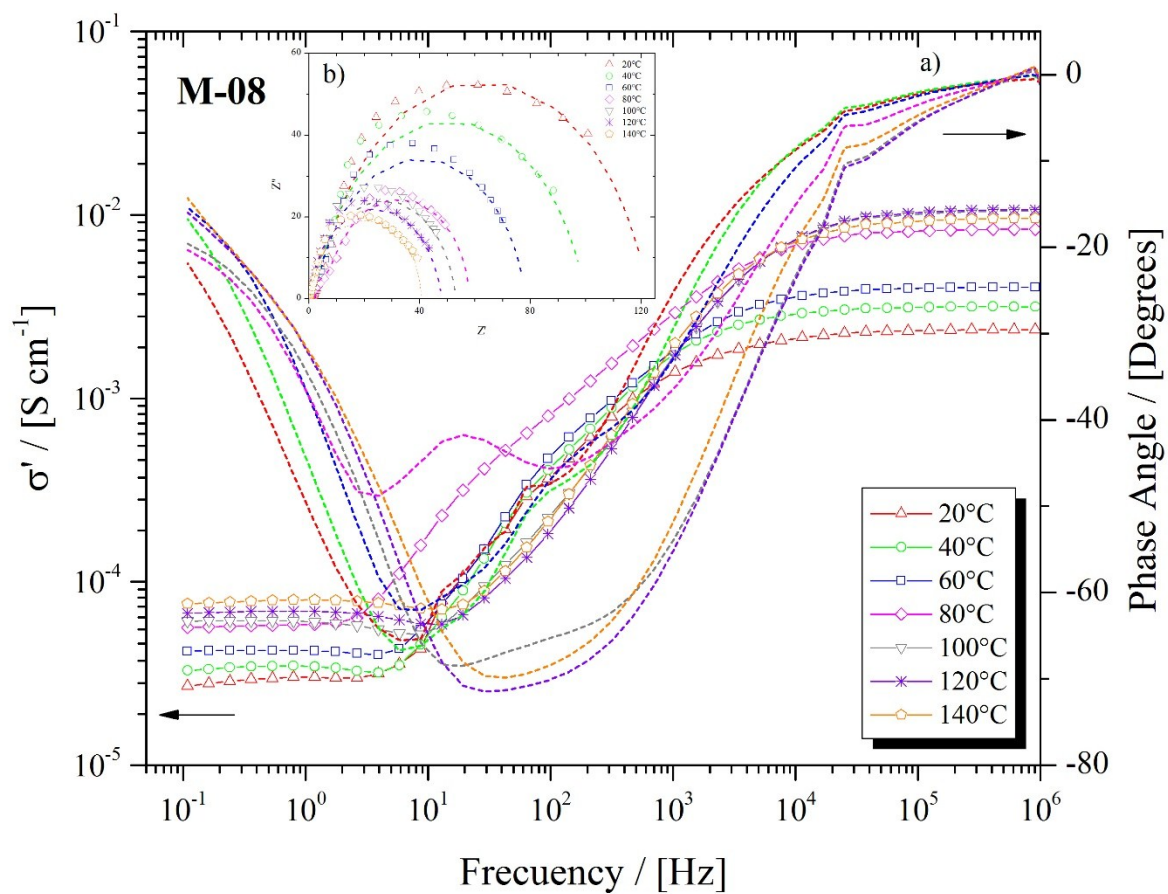

Figure S6.

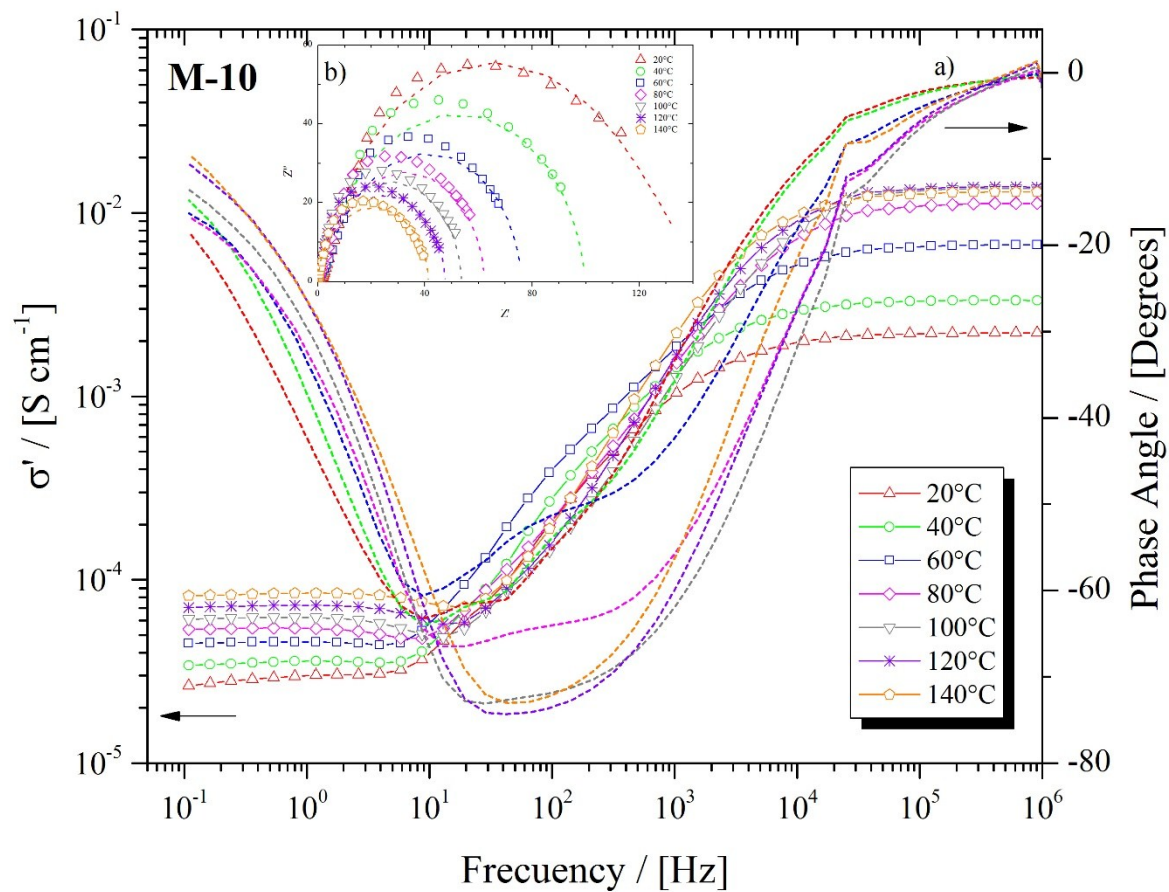



Figure S7.

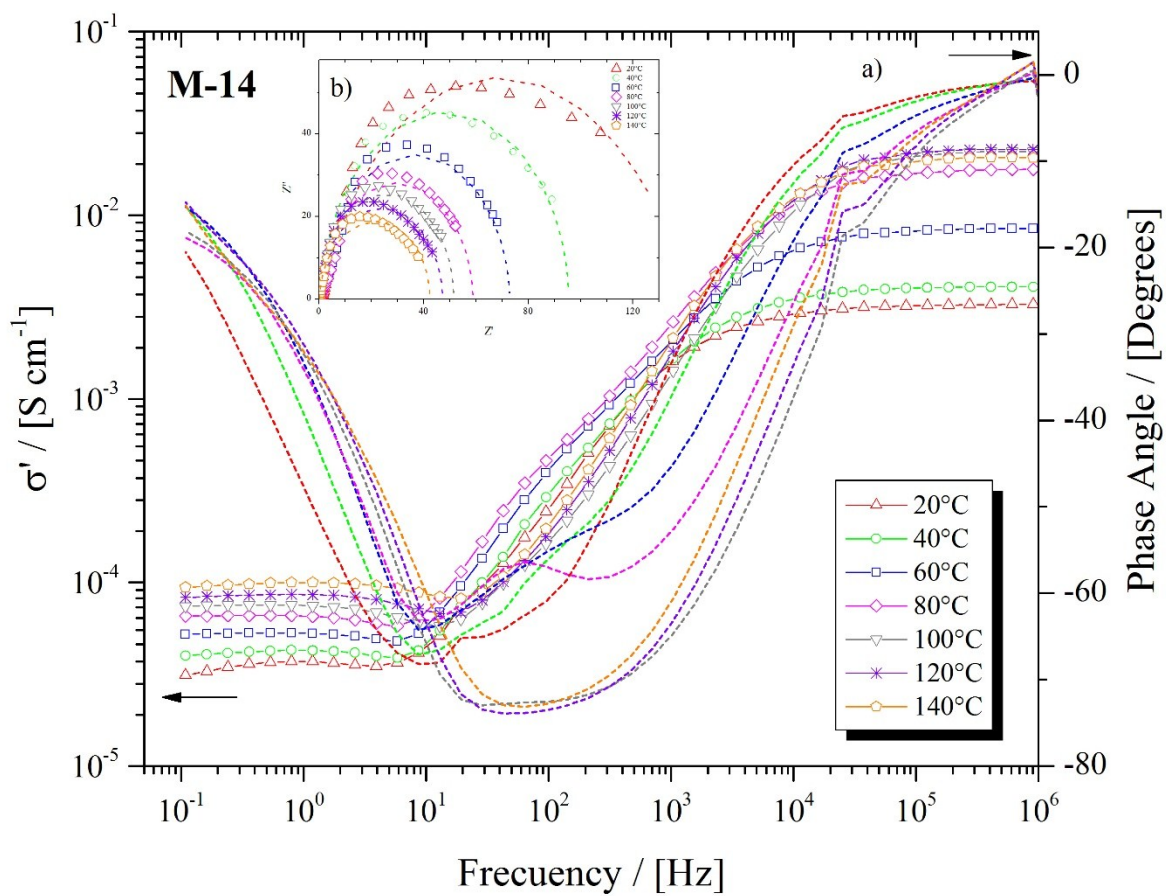

Figure S8.

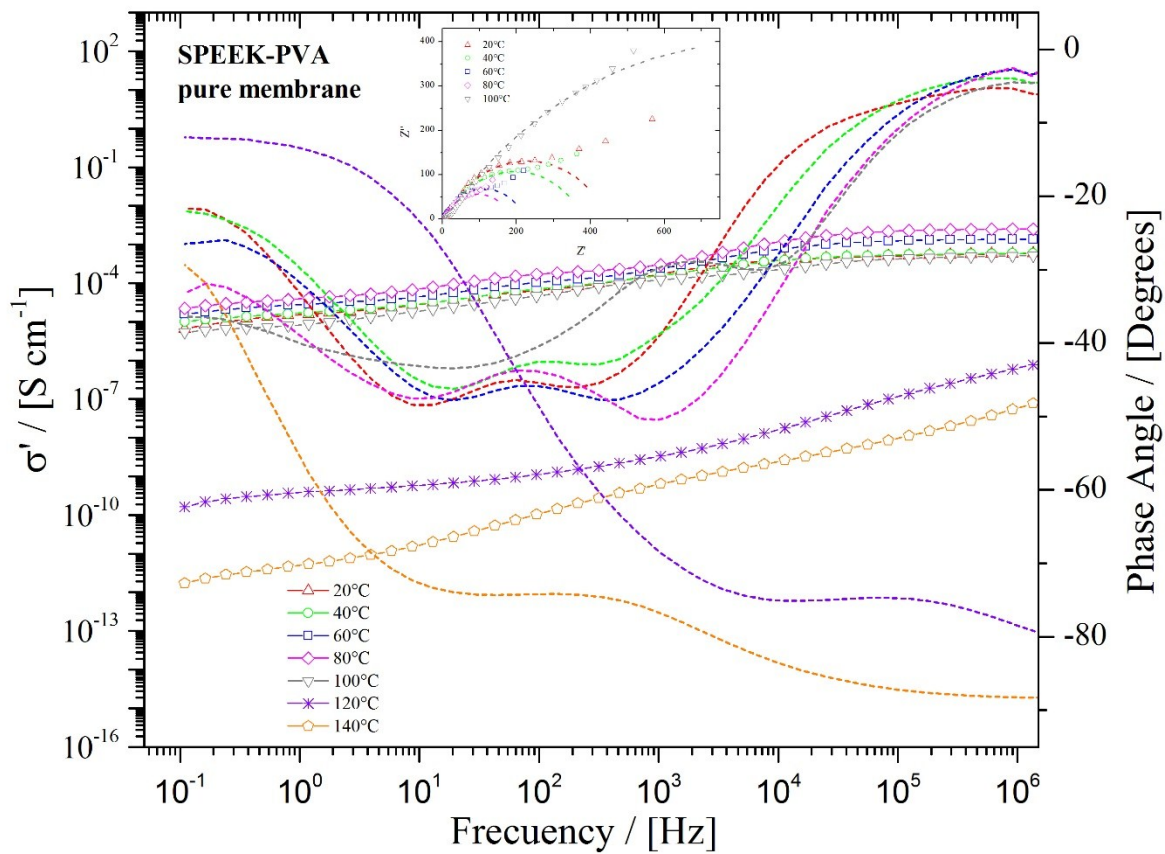



Figure S10.

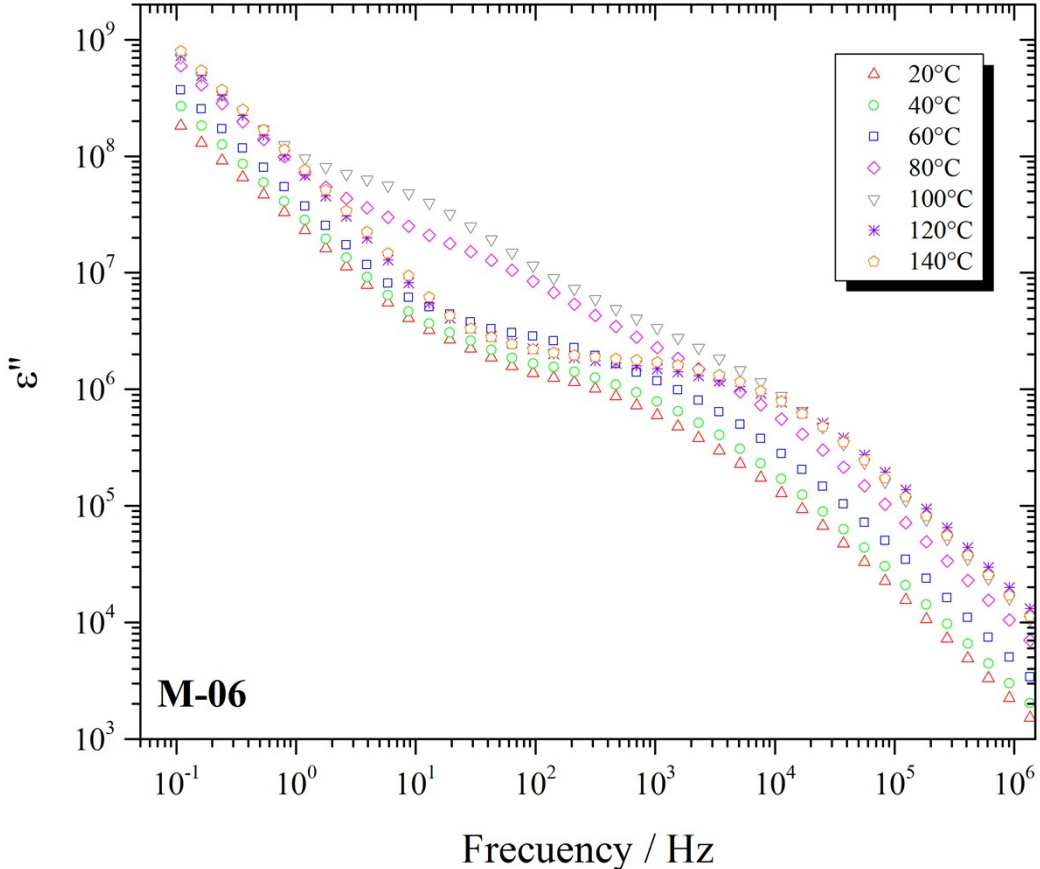



Figure S12.

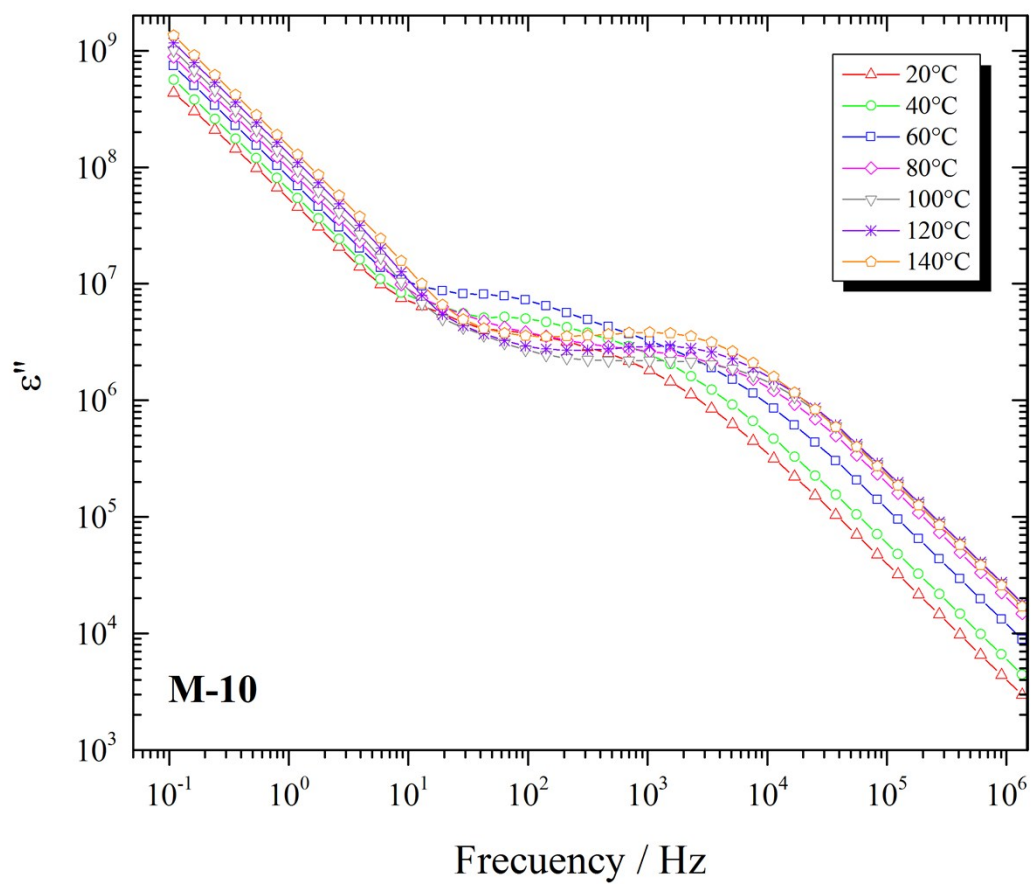



Figure S14.

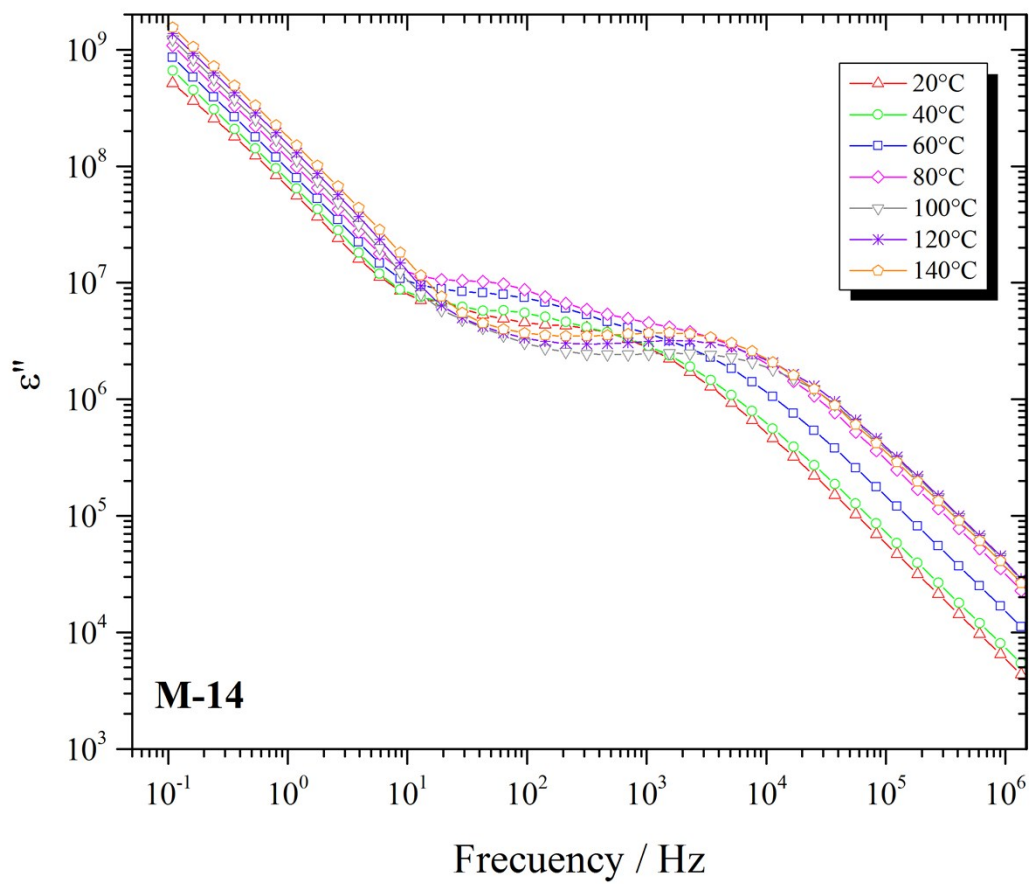



Figure S15.

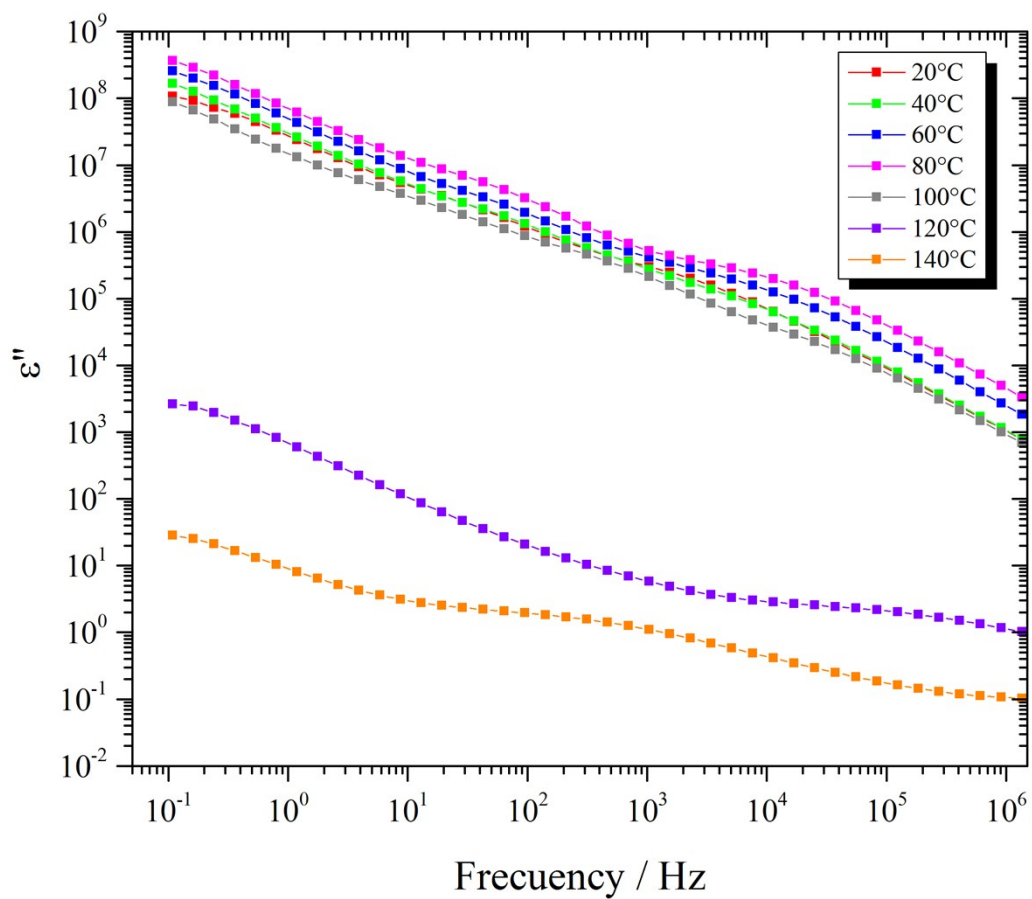

Supplement: c6ra08228a1.pdf [file c6ra08228a1.pdf]
